# Supplementary material for: Tailoring the film morphology and interface band offset of caesium bismuth iodide-based Pb-free perovskite solar cells
Source: Royal Society of Chemistry journal article supplement (doi:10.1039/c9tc02181g), 2019-01-01
Supplement: c9tc02181g1.pdf [file c9tc02181g1.pdf]

## Supporting Information

### **Tailoring the Film Morphology and Interface Band Offset of Caesium Bismuth Iodide based Pb Free Perovskite Solar Cells**

Dhruba B. Khadka<sup>†‡</sup>, Yasuhiro Shirai<sup>†</sup>, Masatoshi Yanagida<sup>†</sup> and Kenjiro Miyano<sup>†</sup>

<sup>†</sup>Global Research Center for Environment and Energy based on Nanomaterials Science (GREEN), National Institute for Materials Science (NIMS), 1-1 Namiki, Tsukuba, Ibaraki 305-0044, Japan.

<sup>‡</sup> International Center for Young Scientists (ICYS), National Institute for Materials Science (NIMS), 1-1 Namiki, Tsukuba, Ibaraki 305-0044, Japan.

### **Corresponding Author**

\*E-mail: DHRUBA.B.Khadka@nims.go.jp

## Table and Figures

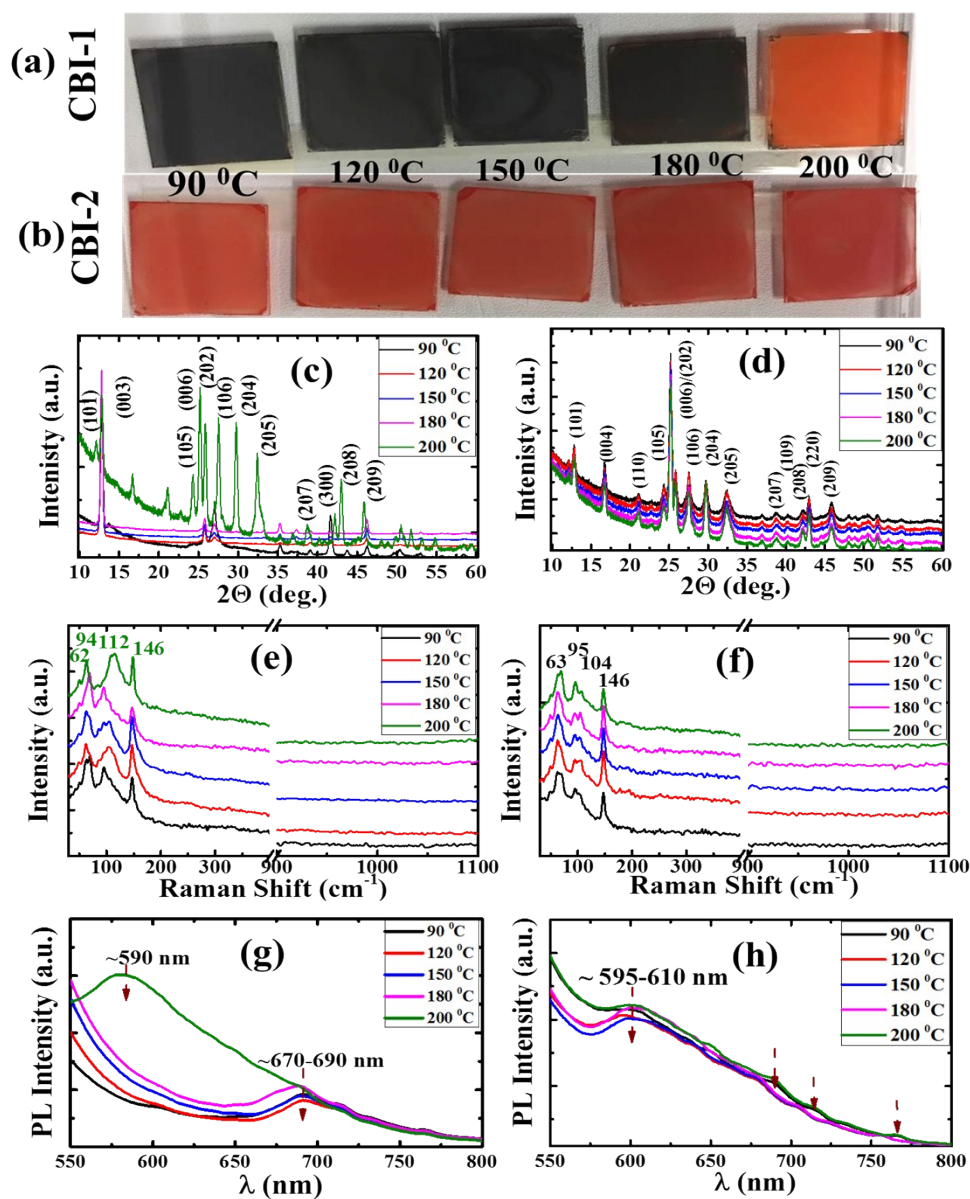

**Fig. S1.** Photographs of Bi-HaP films; (a) CBI-1 and (b) CBI-2 annealed at temperatures; 90, 120,150,180, and 200 °C. XRD patterns (c, d), Raman spectra (e, f) and PL spectra (g, h) of CBI-1 and CBI-2 films, respectively.

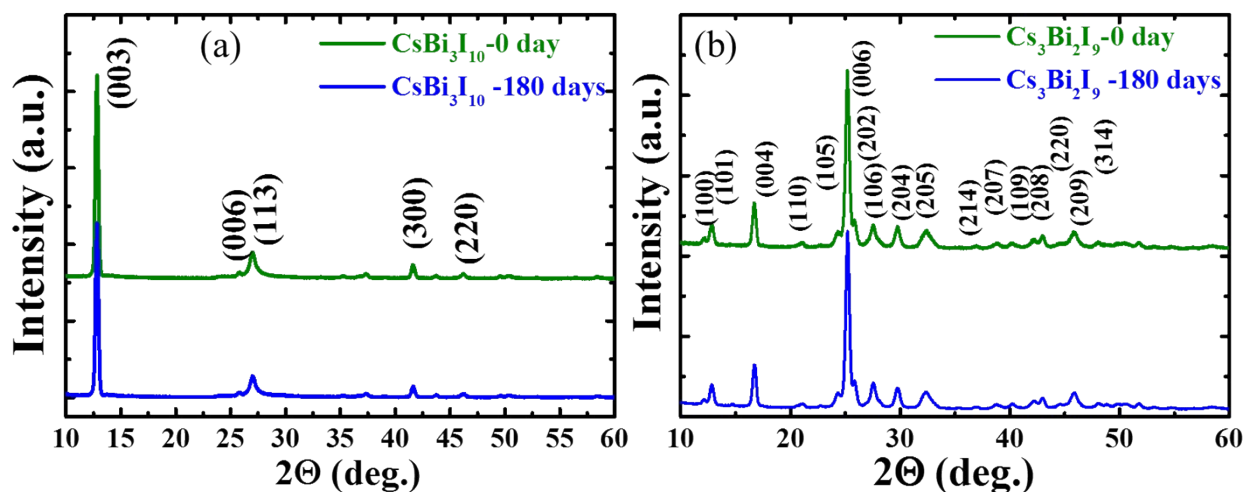

**Fig. S2.** The XRD patterns of fresh and aged (kept under ambient air for 180 days) Bi-HaP (CBI-1 (a) and CBI-2) (b) films.

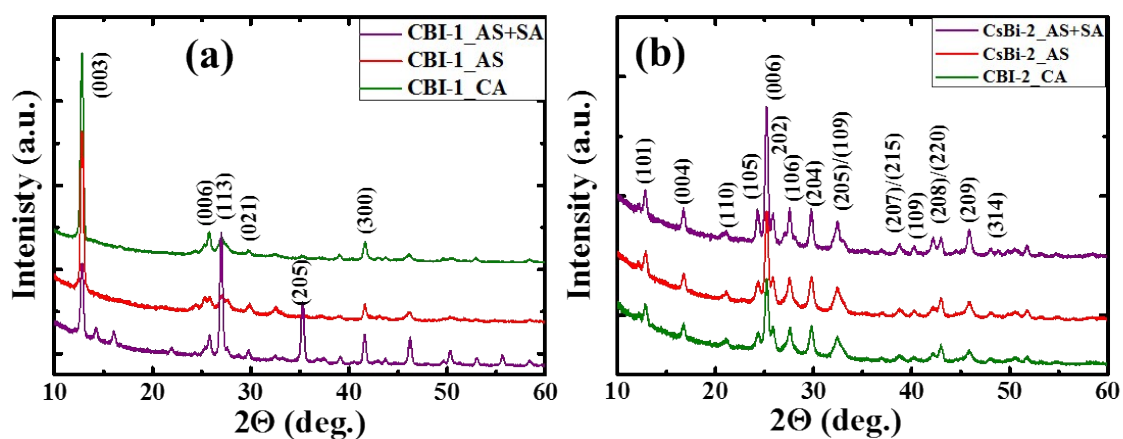

**Fig. S3.** XRD patterns of CBI-1 (a) and CBI-2 (b) thin films fabricated with CA, AS dripping and AS followed by SA under ambient DMF solvent vapour.

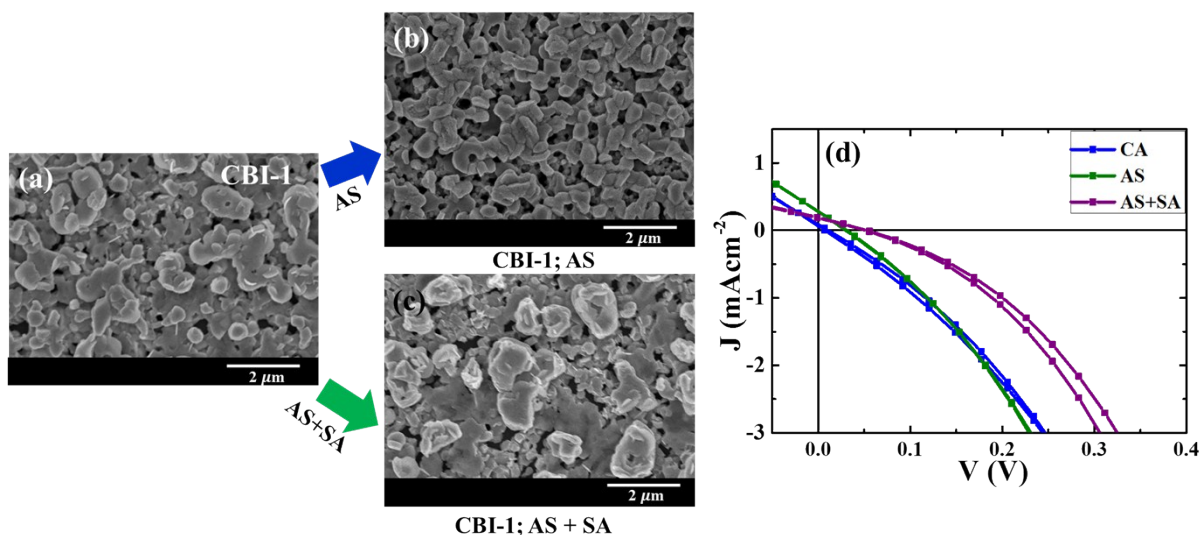

**Fig. S4.** SEM images of CBI-1 films fabricated at different conditions; (a) CA, (b) antisolvent (AS) dripping, (c) antisolvent dripping subsequent with solvent vapor annealing (AS+SA).

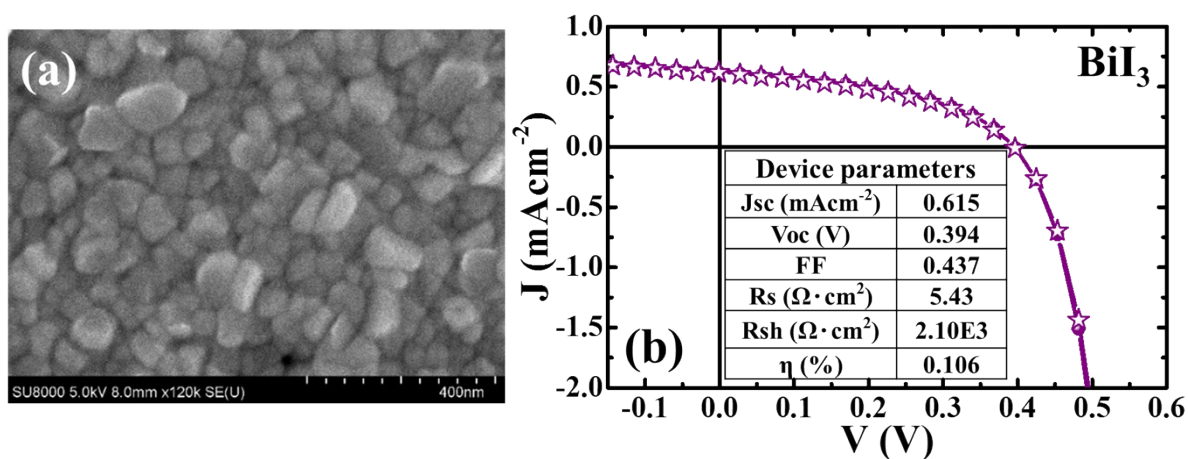

**Fig. S5.** Morphology of BiI<sub>3</sub> film (a) and J-V characteristic of the BiI<sub>3</sub> solar cell of configuration (ITO/PTAA/BiI<sub>3</sub>/PCBM/AZO/Ag). This is much better than CBI-1 film. Here, the symbols in J-V curves stand for forward and reverse scan direction.

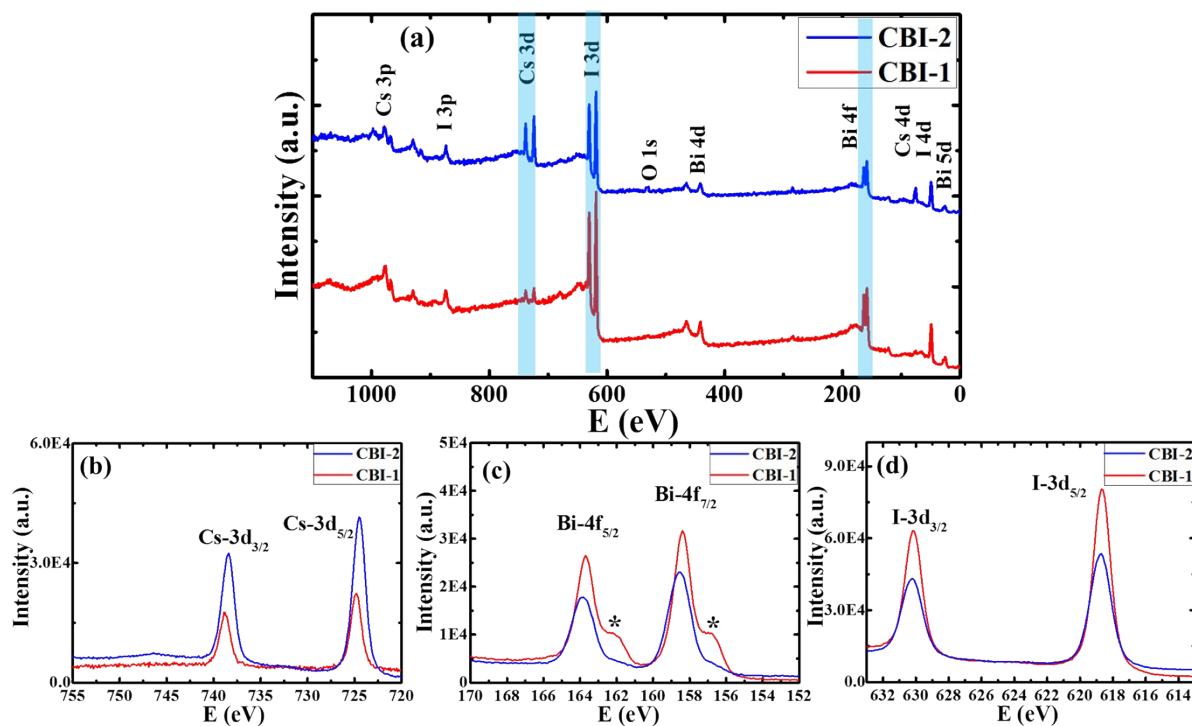

**Fig. S6.** XPS spectra of CBI-1 (AS) and CBI-2 (AS+SA) films (a). The core-level peak for Cs-3d (b), Bi-4f and (c) I-3d. The two steric symbols in the plot (c) at  $\sim 162$  eV and  $157$  eV assigned for metallic Bi.

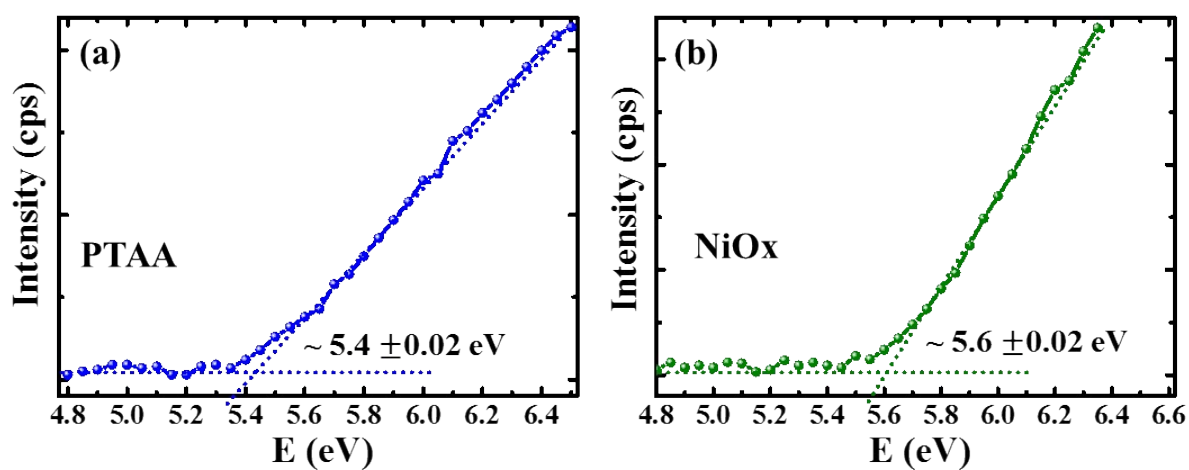

**Fig. S7.** Photoelectron spectra of plasma treated PTAA (a) and NiOx (b) films.
